# Supplementary material
Source: PubMed Central journal article supplement (PMC7805321)

## Supplementary Information

### Targeted Next Generation Sequencing (NGS) Variant Annotation

Manual review and annotation were performed for all single-nucleotide variants, copy-number variations, and translocation calls made by the bioinformatics pipeline. Variants that were previously reported as single-nucleotide polymorphisms in gnomAD were excluded as likely germline variants. Variants were classified as pathogenic if one or more of the following conditions were met: (1) reported in COSMIC as a recurrent event, (2) reported in OncoKB as at least likely oncogenic, (3) compelling evidence of biological effect in the literature. The remaining variants were classified as variants of uncertain significance. The following copynumber alterations were classified as pathogenic: amplifications, homozygous deletions, concurrent copy-number gain/loss and pathogenic mutation involving the same gene (e.g., loss of heterozygosity, amplification of allele bearing an activating mutation) and copy gains or losses of oncogenes/tumor-suppressor genes that are shared across the cohort (>20% of cases).

### Supplementary Tables

Table S1: List of all single nucleotide variants/indels detected. SNV: single nucleotide variant; VAF: variant allele fraction; LPV: likely pathogenic variant; VUS: variant of uncertain significance.

Table S2: List of all copy number variants detected. LPV: likely pathogenic variant; VUS: variant of uncertain significance.

Table S3: List of all structural variants detected. LPV: likely pathogenic variant; VUS: variant of uncertain significance.

Table S4: List of all genes covered in targeted next generation sequencing panel (Oncopanel POPv3; 447 genes).

Table S5: TMA and whole tissue section immunohistochemical staining results.

### Supplementary Figures

Figure S1: Representative images of *NOTCH2* mutated SMZL stained for NICD2 and total NOTCH2.

Figure S2: Representative images of patient derived xenograft models of triple negative breast cancer stained for total NOTCH1.

Figure S3: Histogram showing *NOTCH2* exon 34 RNA-seq coverage across the DLBCL cohort.

Figure S4: Representative images of *NOTCH2* mutated DLBCL stained for BLC6, NICD2, and total NOTCH2

**Table S1: Detected single nucleotide variants and indels, SMZL**

| Case | Gene           | SNV                                     | VAF | Fold Coverage | Variant classification | LPV/VUS |
|------|----------------|-----------------------------------------|-----|---------------|------------------------|---------|
| 1    | <i>NOTCH2</i>  | c.6967C>T (p.Q2323*), exon 34           | 4%  | 149           | Nonsense mutation      | LPV     |
| 1    | <i>KLF2</i>    | c.862C>T (p.H288Y), exon 2              | 10% | 190           | Missense mutation      | LPV     |
| 1    | <i>ABCB11</i>  | c.3524A>C (p.K1175T), exon 26           | 50% | 59            | Missense mutation      | VUS     |
| 1    | <i>BLM</i>     | c.232C>T (p.P78S), exon 3               | 42% | 56            | Missense mutation      | VUS     |
| 1    | <i>BUB1B</i>   | c.1261C>T (p.R421W), exon 9             | 38% | 26            | Missense mutation      | VUS     |
| 1    | <i>CYLD</i>    | c.913+5G>T ( )                          | 53% | 39            | Intronic mutation      | VUS     |
| 1    | <i>NEIL3</i>   | c.1379T>G (p.F460C), exon 8             | 41% | 53            | Missense mutation      | VUS     |
| 1    | <i>VEGFA</i>   | c.88C>G (p.R30G), exon 1                | 52% | 36            | Missense mutation      | VUS     |
| 2    | <i>NOTCH2</i>  | c.7090C>T (p.Q2364*), exon 34           | 30% | 130           | Nonsense mutation      | LPV     |
| 2    | <i>ARID1A</i>  | c.2757_2758insC (p.Q920Pfs*16), exon 9  | 31% | 125           | Frameshift mutation    | LPV     |
| 2    | <i>NFKBIE</i>  | c.759_762delTTAC (p.Y254Sfs*13), exon 1 | 45% | 217           | Frameshift mutation    | LPV     |
| 2    | <i>ALK</i>     | c.661G>C (p.G221R), exon 1              | 43% | 105           | Missense mutation      | VUS     |
| 2    | <i>C1orf86</i> | c.273G>A (p.P91P), exon 3               | 48% | 125           | Missense mutation      | VUS     |
| 2    | <i>DOCK8</i>   | c.3010C>T (p.R1004W), exon 25           | 43% | 79            | Missense mutation      | VUS     |
| 2    | <i>MGA</i>     | c.7861C>A (p.P2621T), exon 23           | 47% | 76            | Missense mutation      | VUS     |
| 3    | <i>NFKBIE</i>  | c.782+1G>C ( )                          | 30% | 152           | Splice site mutation   | LPV     |
| 3    | <i>ARID1B</i>  | c.2765A>T (p.Q922L), exon 9             | 50% | 322           | Missense mutation      | VUS     |

|   |               |                                                           |     |     |                        |     |
|---|---------------|-----------------------------------------------------------|-----|-----|------------------------|-----|
| 3 | <i>BRD4</i>   | c.3404A>G<br>(p.K1135R), exon 16                          | 45% | 221 | Missense<br>mutation   | VUS |
| 3 | <i>CD274</i>  | c.454G>T (p.E152*),<br>exon 4                             | 73% | 163 | Nonsense<br>mutation   | VUS |
| 3 | <i>CTNNA1</i> | c.665A>G (p.Y222C),<br>exon 6                             | 41% | 203 | Missense<br>mutation   | VUS |
| 3 | <i>KDM5A</i>  | c.3472A>G<br>(p.I1158V), exon 23                          | 52% | 273 | Missense<br>mutation   | VUS |
| 3 | <i>MAFB</i>   | c.539C>T (p.A180V),<br>exon 1                             | 22% | 149 | Missense<br>mutation   | VUS |
| 3 | <i>MGA</i>    | c.2207C>T (p.S736L),<br>exon 6                            | 42% | 90  | Missense<br>mutation   | VUS |
| 3 | <i>MSH6</i>   | c.67G>C (p.A23P), exon<br>1                               | 42% | 235 | Missense<br>mutation   | VUS |
| 3 | <i>NOTCH3</i> | c.1379-5C>T ( )                                           | 58% | 252 | Intronic<br>mutation   | VUS |
| 3 | <i>PRKDC</i>  | c.8578A>G<br>(p.I2860V), exon 64                          | 53% | 134 | Missense<br>mutation   | VUS |
| 3 | <i>RPTOR</i>  | c.3964G>A<br>(p.D1322N), exon 34                          | 46% | 238 | Missense<br>mutation   | VUS |
| 4 | <i>NOTCH2</i> | c.7165C>T<br>(p.Q2389*), exon 34                          | 22% | 666 | Nonsense<br>mutation   | LPV |
| 4 | <i>MYD88</i>  | c.10_28delGACCGCGC<br>TGAGGCTCCAG<br>(p.A6Pfs*39), exon 1 | 27% | 339 | Frameshift<br>mutation | VUS |
| 4 | <i>BRIP1</i>  | c.2905+67T>C ( )                                          | 47% | 165 | Intronic<br>mutation   | VUS |
| 4 | <i>ERBB3</i>  | c.234+6T>G ( )                                            | 18% | 553 | Intronic<br>mutation   | VUS |
| 4 | <i>MLH3</i>   | c.3608T>C (p.L1203S),<br>exon 6                           | 47% | 491 | Missense<br>mutation   | VUS |
| 4 | <i>PALB2</i>  | c.48+814G>T ( )                                           | 46% | 294 | Intronic<br>mutation   | VUS |
| 4 | <i>SH2B3</i>  | c.1058A>G<br>(p.Q353R), exon 6                            | 46% | 546 | Missense<br>mutation   | VUS |
| 4 | <i>TOPBP1</i> | c.4388G>A<br>(p.C1463Y), exon 27                          | 53% | 569 | Missense<br>mutation   | VUS |
| 4 | <i>WHSC1</i>  | c.928-6T>C ( )                                            | 20% | 210 | Intronic<br>mutation   | VUS |

|   |                 |                                        |     |     |                            |     |
|---|-----------------|----------------------------------------|-----|-----|----------------------------|-----|
| 4 | <i>ZNF217</i>   | c.1795_1796delAC (p.T599Sfs*5), exon 3 | 39% | 895 | Frameshift mutation        | VUS |
| 5 | <i>TRAF3</i>    | c.772C>T (p.Q258*), exon 8             | 6%  | 532 | Nonsense mutation          | LPV |
| 5 | <i>TRAF3</i>    | c.1387G>A (p.D463N), exon 11           | 7%  | 759 | Missense mutation          | LPV |
| 5 | <i>TNFAIP3</i>  | c.1681C>T (p.Q561*), exon 7            | 5%  | 759 | Nonsense mutation          | LPV |
| 5 | <i>FGFR4</i>    | c.1305C>T (p.G435G), exon 10           | 48% | 587 | Missense mutation          | VUS |
| 5 | <i>HABP2</i>    | c.1556G>T (p.G519V), exon 13           | 3%  | 472 | Missense mutation          | VUS |
| 5 | <i>NFKBIZ</i>   | c.835C>G (p.Q279E), exon 5             | 15% | 680 | Missense mutation          | VUS |
| 5 | <i>NOTCH1</i>   | c.301C>T (p.P101S), exon 3             | 13% | 554 | Missense mutation          | VUS |
| 5 | <i>PMS2</i>     | c.857A>G (p.D286G), exon 8             | 49% | 513 | Missense mutation          | VUS |
| 5 | <i>RHOH</i>     | c.46G>A (p.G16R), exon 3               | 2%  | 548 | Missense mutation          | VUS |
| 5 | <i>SLC25A13</i> | c.2026T>C (p.*676Qext*16), exon 18     | 52% | 423 | Nonstop extension mutation | VUS |
| 5 | <i>SOX9</i>     | c.1105C>G (p.Q369E), exon 3            | 43% | 137 | Missense mutation          | VUS |
| 5 | <i>TCF3</i>     | c.1586+75G>A ( )                       | 49% | 448 | Intronic mutation          | VUS |
| 5 | <i>TOPBP1</i>   | c.4173+4T>C ( )                        | 49% | 302 | Intronic mutation          | VUS |
| 5 | <i>TRAF7</i>    | c.1121T>C (p.M374T), exon 12           | 48% | 291 | Missense mutation          | VUS |
| 6 | <i>CD79B</i>    | c.552+1G>A ( )                         | 13% | 581 | Splice site mutation       | LPV |
| 6 | <i>GATA4</i>    | c.19A>C (p.M7L), exon 2                | 43% | 147 | Missense mutation          | VUS |
| 7 | <i>KMT2D</i>    | c.15648T>G (p.Y5216*), exon 48         | 30% | 608 | Nonsense mutation          | LPV |
| 7 | <i>B2M</i>      | c.37_38delCT (p.L15Ffs*41), exon 1     | 25% | 907 | Frameshift mutation        | LPV |

|   |                |                                                 |     |     |                          |     |
|---|----------------|-------------------------------------------------|-----|-----|--------------------------|-----|
| 7 | <i>NFKBIE</i>  | c.759_762delTTAC (p.Y254Sfs*13), exon 1         | 22% | 499 | Frameshift mutation      | LPV |
| 7 | <i>RAD50</i>   | c.3792_3799delTCTG GTAA (p.L1265Hfs*3), exon 25 | 21% | 461 | Frameshift mutation      | LPV |
| 7 | <i>KAT6B</i>   | c.2373+7G>A ()                                  | 50% | 277 | Intronic mutation        | VUS |
| 7 | <i>MAX</i>     | c.172-5C>A ()                                   | 44% | 314 | Intronic mutation        | VUS |
| 7 | <i>PML</i>     | c.1710+1396C>T ()                               | 47% | 455 | Intronic mutation        | VUS |
| 7 | <i>TNFAIP3</i> | c.586A>G (p.I196V), exon 4                      | 36% | 352 | Missense mutation        | VUS |
| 8 | <i>NOTCH1</i>  | c.7183C>T (p.Q2395*), exon 34                   | 16% | 225 | Nonsense mutation        | LPV |
| 8 | <i>TRAF3</i>   | c.212_213insCTT (p.R71_F72insF), exon 2         | 16% | 361 | Insertion (1AA) mutation | LPV |
| 8 | <i>DIS3L2</i>  | c.2497-159G>A ()                                | 48% | 221 | Intronic mutation        | VUS |
| 8 | <i>HABP2</i>   | c.365G>T (p.R122L), exon 5                      | 48% | 191 | Missense mutation        | VUS |
| 8 | <i>IDH2</i>    | c.576C>A (p.F192L), exon 5                      | 48% | 252 | Missense mutation        | VUS |
| 8 | <i>LMO1</i>    | c.28G>A (p.V10M), exon 2                        | 43% | 136 | Missense mutation        | VUS |
| 8 | <i>MAP2K2</i>  | c.1142G>C (p.G381A), exon 11                    | 44% | 177 | Missense mutation        | VUS |
| 8 | <i>PBRM1</i>   | c.2932G>A (p.V978I), exon 18                    | 51% | 161 | Missense mutation        | VUS |
| 8 | <i>PHOX2B</i>  | c.29A>C (p.N10T), exon 1                        | 22% | 154 | Missense mutation        | VUS |
| 9 | <i>TP53</i>    | c.576G>T (p.Q192H), exon 6                      | 70% | 167 | Missense mutation        | LPV |
| 9 | <i>TP53</i>    | c.577C>T (p.H193Y), exon 6                      | 68% | 169 | Missense mutation        | LPV |
| 9 | <i>PIM1</i>    | c.549G>C (p.K183N), exon 4                      | 40% | 377 | Missense mutation        | VUS |
| 9 | <i>POT1</i>    | c.1781_1782delGA (p.G594Dfs*4), exon 18         | 50% | 142 | Frameshift mutation      | LPV |

|    |               |                                  |     |     |                      |     |
|----|---------------|----------------------------------|-----|-----|----------------------|-----|
| 9  | <i>AR</i>     | c.1885+8556G>A ( )               | 47% | 182 | Intronic mutation    | VUS |
| 9  | <i>CALR</i>   | c.1139A>G (p.E380G),<br>exon 9   | 45% | 127 | Missense mutation    | VUS |
| 9  | <i>CCND3</i>  | c.850C>T (p.P284S),<br>exon 5    | 46% | 396 | Missense mutation    | VUS |
| 9  | <i>CYLD</i>   | c.725A>G (p.E242G),<br>exon 3    | 46% | 175 | Missense mutation    | VUS |
| 9  | <i>FANCD2</i> | c.3963+8C>T ( )                  | 44% | 125 | Intronic mutation    | VUS |
| 9  | <i>JAK3</i>   | c.2805+1G>C ( )                  | 37% | 285 | Splice site mutation | VUS |
| 9  | <i>KDM5A</i>  | c.1653+8T>G ( )                  | 33% | 311 | Intronic mutation    | VUS |
| 9  | <i>MAP2K2</i> | c.937C>T (p.R313W)               | 46% | 392 | Missense mutation    | VUS |
| 9  | <i>NEIL2</i>  | c.790G>A (p.V264M),<br>exon 6    | 50% | 384 | Missense mutation    | VUS |
| 9  | <i>RAD52</i>  | c.980A>C (p.D327A),<br>exon 11   | 37% | 312 | Missense mutation    | VUS |
| 9  | <i>VHL</i>    | c.154G>A (p.E52K),<br>exon 1     | 51% | 141 | Missense mutation    | VUS |
| 10 | <i>NOTCH2</i> | c.7090C>T<br>(p.Q2364*), exon 34 | 19% | 146 | Nonsense mutation    | LPV |
| 10 | <i>TP53</i>   | c.406C>T (p.Q136*),<br>exon 5    | 19% | 177 | Nonsense mutation    | LPV |
| 10 | <i>TP53</i>   | c.569C>T (p.P190L),<br>exon 6    | 40% | 108 | Missense mutation    | LPV |
| 10 | <i>MYC</i>    | c.221C>T (p.P74L), exon<br>2     | 30% | 151 | Missense mutation    | LPV |
| 10 | <i>BCOR</i>   | c.86+8C>G ( )                    | 44% | 125 | Intronic mutation    | VUS |
| 10 | <i>CIC</i>    | c.101C>T (p.A34V),<br>exon 2     | 46% | 173 | Missense mutation    | VUS |
| 10 | <i>NR0B1</i>  | c.1054G>T (p.V352L),<br>exon 1   | 32% | 151 | Missense mutation    | VUS |
| 10 | <i>TAL1</i>   | c.262G>A (p.V88M),<br>exon 3     | 53% | 13  | Missense mutation    | VUS |
| 10 | <i>TOPBP1</i> | c.3304G>A<br>(p.A1102T), exon 20 | 40% | 132 | Missense mutation    | VUS |

|    |               |                                           |     |     |                        |     |
|----|---------------|-------------------------------------------|-----|-----|------------------------|-----|
| 11 | <i>NOTCH2</i> | c.7198C>T<br>(p.R2400*), exon 34          | 25% | 488 | Nonsense<br>mutation   | LPV |
| 11 | <i>TP53</i>   | c.314G>C (p.G105A),<br>exon 4             | 2%  | 390 | Missense<br>mutation   | LPV |
| 11 | <i>CTNNB1</i> | c.1161T>A (p.N387K),<br>exon 9            | 17% | 440 | Missense<br>mutation   | LPV |
| 11 | <i>FAS</i>    | c.847C>A (p.Q283K),<br>exon 9             | 16% | 289 | Missense<br>mutation   | LPV |
| 11 | <i>ARID1A</i> | c.4717C>T<br>(p.Q1573*), exon 18          | 23% | 278 | Nonsense<br>mutation   | LPV |
| 11 | <i>KMT2D</i>  | c.7104delC<br>(p.R2370Afs*14), exon<br>31 | 21% | 594 | Frameshift<br>mutation | LPV |
| 11 | <i>ABCB11</i> | c.1460G>T (p.R487L),<br>exon 14           | 18% | 259 | Missense<br>mutation   | VUS |
| 11 | <i>FANCA</i>  | c.1360G>T (p.A454S),<br>exon 15           | 49% | 381 | Missense<br>mutation   | VUS |
| 11 | <i>IKZF1</i>  | c.640A>C (p.S214R),<br>exon 6             | 16% | 397 | Missense<br>mutation   | VUS |
| 11 | <i>KMT2D</i>  | c.6649C>T<br>(p.R2217C), exon 31          | 21% | 275 | Missense<br>mutation   | VUS |
| 11 | <i>MCL1</i>   | c.693G>C (p.M231I),<br>exon 2             | 20% | 403 | Missense<br>mutation   | VUS |
| 11 | <i>PPARG</i>  | c.480+7delA ( )                           | 13% | 291 | Intronic<br>mutation   | VUS |
| 11 | <i>PRKDC</i>  | c.3364+4C>T ( )                           | 46% | 378 | Intronic<br>mutation   | VUS |
| 11 | <i>RECQL4</i> | c.1063C>T<br>(p.R355W), exon 5            | 25% | 402 | Missense<br>mutation   | VUS |
| 11 | <i>SMO</i>    | c.1040G>C (p.G347A),<br>exon 5            | 22% | 410 | Missense<br>mutation   | VUS |
| 12 | <i>NOTCH2</i> | c.7225C>T<br>(p.Q2409*), exon 34          | 90% | 92  | Nonsense<br>mutation   | LPV |
| 12 | <i>TP53</i>   | c.818G>A (p.R273H),<br>exon 8             | 83% | 65  | Missense<br>mutation   | LPV |
| 12 | <i>CXCR4</i>  | c.978dupA<br>(p.G327Rfs*21), exon 1       | 47% | 217 | Frameshift<br>mutation | LPV |
| 12 | <i>ERCC3</i>  | c.2263G>A<br>(p.D755N), exon 15           | 43% | 100 | Missense<br>mutation   | VUS |



|    |                |                                  |     |     |                         |     |
|----|----------------|----------------------------------|-----|-----|-------------------------|-----|
| 12 | <i>GLI1</i>    | c.358T>C (p.S120P),<br>exon 4    | 48% | 139 | Missense<br>mutation    | VUS |
| 12 | <i>IKZF1</i>   | c.556G>T (p.D186Y),<br>exon 5    | 41% | 148 | Missense<br>mutation    | VUS |
| 12 | <i>ITK</i>     | c.1282C>A (p.Q428K),<br>exon 13  | 55% | 101 | Missense<br>mutation    | VUS |
| 12 | <i>MYD88</i>   | c.289G>A (p.A97T),<br>exon 1     | 45% | 150 | Missense<br>mutation    | VUS |
| 12 | <i>PALB2</i>   | c.2320A>G (p.K774E),<br>exon 5   | 53% | 103 | Missense<br>mutation    | VUS |
| 12 | <i>PTCH1</i>   | c.1504-4G>A ()                   | 49% | 40  | Intronic<br>mutation    | VUS |
| 12 | <i>SF3B1</i>   | c.1667T>C (p.I556T),<br>exon 12  | 61% | 31  | Missense<br>mutation    | VUS |
| 12 | <i>TP53BP1</i> | c.4528G>A<br>(p.V1510I), exon 21 | 43% | 73  | Missense<br>mutation    | VUS |
| 12 | <i>WRN</i>     | c.1640C>T (p.S547F),<br>exon 13  | 48% | 43  | Missense<br>mutation    | VUS |
| 13 | <i>NOTCH2</i>  | c.7225C>T (p.Q2409*)             | NA  | NA  | Nonsense<br>mutation    | LPV |
| 13 | <i>TP53</i>    | c.818G>A (p.R273H)               | NA  | NA  | Missense<br>mutation    | LPV |
| 14 | <i>KLF2</i>    | c.1049A>G (p.H350R),<br>exon 3   | 37% | 262 | Missense<br>mutation    | LPV |
| 14 | <i>BARD1</i>   | c.335G>A (p.R112Q),<br>exon 3    | 47% | 90  | Missense<br>mutation    | VUS |
| 14 | <i>EP300</i>   | c.5441G>A<br>(p.R1814Q), exon 31 | 37% | 246 | Missense<br>mutation    | VUS |
| 14 | <i>FAT1</i>    | c.13139-1150G>A ()               | 46% | 116 | Intronic<br>mutation    | VUS |
| 14 | <i>NTRK1</i>   | c.2044C>T (p.R682C),<br>exon 15  | 48% | 97  | Missense<br>mutation    | VUS |
| 14 | <i>SMARCB1</i> | c.749C>T (p.T250M),<br>exon 6    | 46% | 312 | Missense<br>mutation    | VUS |
| 14 | <i>UBE2T</i>   | c.523C>T (p.H175Y),<br>exon 7    | 46% | 165 | Missense<br>mutation    | VUS |
| 14 | <i>WAS</i>     | c.273+4_273+5insCC<br>( )        | 33% | 340 | Intronic<br>mutation    | VUS |
| 15 | <i>KLF2</i>    | c.76-1delG ()                    | 23% | 526 | Splice site<br>mutation | LPV |

|    |                |                                                                       |     |     |                                       |     |
|----|----------------|-----------------------------------------------------------------------|-----|-----|---------------------------------------|-----|
| 15 | <i>BRCA2</i>   | c.9271G>A<br>(p.V3091I), exon 25                                      | 37% | 54  | Missense<br>mutation                  | VUS |
| 15 | <i>FANCB</i>   | c.1079C>T<br>(p.T360M), exon 3                                        | 40% | 66  | Missense<br>mutation                  | VUS |
| 15 | <i>FOXL2</i>   | c.672_674delAGC<br>(p.A227del), exon 1                                | 40% | 390 | Deletion (1AA)<br>mutation            | VUS |
| 15 | <i>NRG1</i>    | c.14G>T (p.R5L), exon 1                                               | 29% | 217 | Missense<br>mutation                  | VUS |
| 15 | <i>PAX5</i>    | c.*15C>T (), exon 10                                                  | 50% | 320 | 3' untranslated<br>region<br>mutation | VUS |
| 16 | <i>NOTCH2</i>  | c.6463G>A<br>(p.E2155K), exon 34                                      | 11% | 88  | Missense<br>mutation                  | VUS |
| 16 | <i>TP53</i>    | c.376-2A>T ()                                                         | 54% | 110 | Splice site<br>mutation               | LPV |
| 16 | <i>ARID1B</i>  | c.505_506delGTinsCC<br>(p.V169P), exon 1                              | 52% | 26  | Indel mutation                        | VUS |
| 16 | <i>BRCA1</i>   | c.4993G>A<br>(p.V1665M), exon 16                                      | 46% | 39  | Missense<br>mutation                  | VUS |
| 16 | <i>CDKN1C</i>  | c.632_633insACCGGC<br>(p.P210_A211dup), exon<br>1                     | 25% | 44  | Insertion (2AA)<br>mutation           | VUS |
| 16 | <i>DIS3L2</i>  | c.795C>T (p.Y265Y),<br>exon 8                                         | 44% | 169 | Missense<br>mutation                  | VUS |
| 16 | <i>ERCC2</i>   | c.2260G>C (p.E754Q),<br>exon 23                                       | 55% | 187 | Missense<br>mutation                  | VUS |
| 16 | <i>FANCA</i>   | c.3788_3790delTCT<br>(p.F1263del), exon 38                            | 33% | 118 | Deletion (1AA)<br>mutation            | LPV |
| 16 | <i>FAT1</i>    | c.13660G>A<br>(p.E4554K), exon 27                                     | 36% | 187 | Missense<br>mutation                  | VUS |
| 16 | <i>MAP3K1</i>  | c.4115-6T>C ()                                                        | 36% | 86  | Intronic<br>mutation                  | VUS |
| 16 | <i>RET</i>     | c.3332C>T<br>(p.T1111M), exon 20                                      | 40% | 86  | Missense<br>mutation                  | VUS |
| 16 | <i>RPA1</i>    | c.703G>A (p.A235T),<br>exon 9                                         | 26% | 110 | Missense<br>mutation                  | VUS |
| 16 | <i>SMARCA4</i> | c.3547-<br>17_3557delGGCACCT<br>CTTCCCCCAGGACCTG<br>CAAGC (), exon 26 | 8%  | 167 | Splice site<br>mutation               | LPV |

|    |          |                                                         |     |     |                        |     |
|----|----------|---------------------------------------------------------|-----|-----|------------------------|-----|
| 16 | SOX9     | c.1081C>A (p.Q361K),<br>exon 3                          | 42% | 28  | Missense<br>mutation   | VUS |
| 16 | SUZ12    | c.1223C>G (p.T408R),<br>exon 11                         | 50% | 10  | Missense<br>mutation   | VUS |
| 16 | TCF3     | c.16A>G (p.R6G), exon<br>2                              | 52% | 228 | Missense<br>mutation   | VUS |
| 17 | FAN1     | c.308C>A (p.P103Q),<br>exon 2                           | 35% | 45  | Missense<br>mutation   | VUS |
| 17 | GNAS     | c.2182G>A<br>(p.D728N), exon 3                          | 43% | 114 | Missense<br>mutation   | VUS |
| 17 | MYCL     | c.496+24A>G ( )                                         | 46% | 94  | Intronic<br>mutation   | VUS |
| 17 | NKX3-1   | c.395C>T (p.S132F),<br>exon 2                           | 40% | 163 | Missense<br>mutation   | VUS |
| 17 | RAD50    | c.2047G>A (p.V683I),<br>exon 13                         | 51% | 113 | Missense<br>mutation   | VUS |
| 18 | NOTCH2   | c.6882_6891delAACC<br>ACCCCT<br>(p.T2295Gfs*8), exon 34 | 6%  | 381 | Frameshift<br>mutation | LPV |
| 18 | IDH2     | c.374-8C>T ( )                                          | 40% | 178 | Intronic<br>mutation   | VUS |
| 18 | RSPO2    | c.56G>T (p.S19I), exon 2                                | 42% | 224 | Missense<br>mutation   | VUS |
| 19 | NOTCH2   | c.6909dupC<br>(p.I2304Hfs*9)                            | 26% | 652 | Frameshift<br>mutation | LPV |
| 19 | FBXW7    | c.1271_1274dupTATG<br>(p.W425Cfs*13), exon 9            | 20% | 336 | Frameshift<br>mutation | LPV |
| 19 | ARHGAP35 | c.4316G>A<br>(p.R1439Q), exon 6                         | 49% | 609 | Missense<br>mutation   | VUS |
| 19 | ATR      | c.3245G>A<br>(p.R1082H), exon 16                        | 44% | 259 | Missense<br>mutation   | VUS |
| 19 | FLT3     | c.2525A>G (p.Y842C),<br>exon 20                         | 50% | 332 | Missense<br>mutation   | VUS |
| 19 | KMT2D    | c.10969C>G<br>(p.L3657V), exon 39                       | 47% | 456 | Missense<br>mutation   | VUS |
| 19 | TLX3     | c.292G>A (p.G98R),<br>exon 1                            | 36% | 436 | Missense<br>mutation   | VUS |
| 19 | TSHR     | c.1493G>A<br>(p.G498D), exon 11                         | 49% | 621 | Missense<br>mutation   | VUS |

|    |               |                                    |     |     |                        |     |
|----|---------------|------------------------------------|-----|-----|------------------------|-----|
| 19 | <i>XRCC3</i>  | c.637G>A (p.D213N),<br>exon 8      | 48% | 392 | Missense<br>mutation   | VUS |
| 19 | <i>NOTCH2</i> | c.6909dupC<br>(p.I2304Hfs*9)       | 26% | 652 | Frameshift<br>mutation | LPV |
| 20 | <i>SUZ12</i>  | c.910delA<br>(p.N305Tfs*7), exon 8 | 22% | 53  | Frameshift<br>mutation | LPV |
| 20 | <i>IGF2</i>   | c.607G>A (p.E203K),<br>exon 5      | 53% | 176 | missense<br>mutation   | VUS |
| 20 | <i>POLD1</i>  | c.2007-5C>T ( )                    | 51% | 191 | Intronic<br>mutation   | VUS |
| 20 | <i>BRAF</i>   | c.1133A>G (p.N378S),<br>exon 8     | 45% | 62  | Missense<br>mutation   | VUS |

**Table S2: Detected copy number variants, SMZL**

| Case | Chromosome | Region           | Gene(s) affected in region                                                                       | Gain/loss        | LPV/VUS |
|------|------------|------------------|--------------------------------------------------------------------------------------------------|------------------|---------|
| 1    | 8          | p12-23.1         | <i>GATA4, NEIL2, NKX3-1, PTK2B, WRN, NRG1</i>                                                    | Single copy loss | VUS     |
| 2    | 7          | p11.2-22.2       | <i>EGFR, IKZF1, JAZF1, ETV1, RAC1, PMS2, CARD11</i>                                              | Low copy gain    | VUS     |
| 2    | 7          | q31.33-36.1      | <i>POT1, SMO, BRAF, PRSS1, EZH2, RHEB</i>                                                        | Single copy loss | LPV     |
| 3    | 7          | q31.2-34         | <i>MET, POT1, SMO, BRAF, PRSS1</i>                                                               | Single copy loss | LPV     |
| 4    | 3          | q12.3-27.3       | <i>NFKBIZ, CBLB, POLQ, GATA2, MBD4, TOPBP1, FOXL2, ATR, MECOM, TERC, PRKCI, SOX2, ETV5, BCL6</i> | Low copy gain    | LPV     |
| 4    | 7          | q22.1-36.2       | <i>CUX1, RINT1, MET, POT1, SMO, BRAF, PRSS1, EZH2, RHEB, XRCC2, PAXIP1</i>                       | Single copy loss | LPV     |
| 4    | 11         | q22.1-24.2       | <i>YAP1, ATM, SDHD, USP28, HMBS, CBL, ARGHEF12, CHEK1</i>                                        | Single copy loss | VUS     |
| 5    | 7          | q31.2-36.2       | <i>MET, POT1, SMO, BRAF, EZH2, RHEB, XRCC2, PAXIP1</i>                                           | Single copy loss | LPV     |
| 6    | 3          | q12.3-27.3       | <i>NFKBIZ, CBLB, POLQ, GATA2, MBD4, TOPBP1, FOXL2, ATR, MECOM, TERC, PRKCI, SOX2, ETV5, BCL6</i> | Low copy gain    | LPV     |
| 6    | 9          | p13.2-24.3       | <i>PAX5, RMRP, CDKN2B, CDKN2A, MTAP, PDCD1LG2, JAK2, CD274, DOCK8</i>                            | Low copy gain    | VUS     |
| 6    | 18         | Whole chromosome | <i>GATA6, RBBP8, SS18, SETBP1, SMAD2, SMAD4, BCL2</i>                                            | Low copy gain    | VUS     |
| 7    | 1          | p36.22           |                                                                                                  | Single copy loss | VUS     |
| 7    | 1          | q42.2-43         | <i>FH, EXO1</i>                                                                                  | Single copy loss | VUS     |
| 7    | 2          | p16.1            |                                                                                                  | Low copy gain    | VUS     |

|    |    |                  |                                                                                                                                                                                                                |                  |     |
|----|----|------------------|----------------------------------------------------------------------------------------------------------------------------------------------------------------------------------------------------------------|------------------|-----|
| 7  | 3  | q27.3            |                                                                                                                                                                                                                | Low copy gain    | LPV |
| 7  | 4  | p16.3            | <i>WHSC1</i>                                                                                                                                                                                                   | Single copy loss | VUS |
| 9  | 3  | q22.3-26.32      | <i>ATR, PIK3CA</i>                                                                                                                                                                                             | Single copy loss | VUS |
| 9  | 12 | p13.1-13.2       | <i>DKN1B</i>                                                                                                                                                                                                   | Single copy loss | VUS |
| 9  | 12 | q15-23.3         | <i>MDM2, TDG</i>                                                                                                                                                                                               | Single copy loss | VUS |
| 9  | 17 | Whole p arm      | <i>RPA1, TP53, AURKB, MAP2K4</i>                                                                                                                                                                               | Single copy loss | LPV |
| 9  | 17 | Whole q arm      | <i>NF1, SUZ12, RHOT1, RAD51D, CDK12, ERBB2, RARA, SMARCE1, STAT3, BRCA1, ETV4, HOXB13, SPOP, EME1, RNF43, RAD51C, TRIM37, PPM1D, BRIP1, CD79B, AXIN2, PRKAR1A, SOX9, H3F3B, RHBDF2, SRSF2, RPTOR, C17ORF70</i> | Low copy gain    | VUS |
| 9  | 18 | q12.3-21.33      | <i>SETBP1, SMAD2, SMAD4, BCL2</i>                                                                                                                                                                              | Single copy loss | VUS |
| 11 | 4  | p15.2-16.3       | <i>SLC34A2, WHSC1, FGFR3</i>                                                                                                                                                                                   | Single copy loss | VUS |
| 11 | 4  | q35.2            |                                                                                                                                                                                                                | Single copy loss | VUS |
| 11 | 12 | Whole q arm      | <i>ERBB3, STAT6, GLI1, CDK4, MDM2, TDG, SH2B3, PTPN11, HNF1A, POLE</i>                                                                                                                                         | Low copy gain    | VUS |
| 12 | 5  | p13.1            | <i>RICTOR</i>                                                                                                                                                                                                  | Low copy gain    | VUS |
| 12 | 5  | p13.2-15.33      | <i>IL7R, TERT, SDHA</i>                                                                                                                                                                                        | Single copy loss | VUS |
| 12 | 10 | Whole chromosome | <i>GATA3, DCLRE1C, RET, ERCC6, TET1, PRF1, KAT6B, BMPR1A, KLLN, PTEN, FAS, SUFU, NT5C2, SMC3, TCF7L2, HABP2, FGFR2</i>                                                                                         | Single copy loss | VUS |
| 12 | 13 | q22.1-33.3       | <i>DIS3, ERCC5, LIG4</i>                                                                                                                                                                                       | Single copy loss | VUS |
| 12 | 17 | Whole p arm      | <i>RPA1, TP53, AURKB, MAP2K4, FLCN</i>                                                                                                                                                                         | Single copy loss | LPV |

|    |    |                  |                                                                                                                        |                  |     |
|----|----|------------------|------------------------------------------------------------------------------------------------------------------------|------------------|-----|
| 12 | 18 | Whole chromosome | <i>GATA6, RBBP8, SS18, SETBP1, SMAD2, SMAD4, BCL2</i>                                                                  | Single copy loss | VUS |
| 12 | 19 | q13.33-13.41     | <i>BCL2L12, PPP2R1A</i>                                                                                                | Single copy loss | VUS |
| 12 | 20 | p12.3            |                                                                                                                        | Low copy gain    | VUS |
| 13 | 10 | Whole chromosome | <i>GATA3, DCLRE1C, RET, ERCC6, TET1, PRF1, KAT6B, BMPR1A, KLLN, PTEN, FAS, SUFU, NT5C2, SMC3, TCF7L2, HABP2, FGFR2</i> | Single copy loss | VUS |
| 13 | 17 | Whole p arm      | <i>RPA1, TP53, AURKB, MAP2K4, FLCN</i>                                                                                 | Single copy loss | LPV |
| 14 | 3  | q26.2-27.3       | <i>MECOM, TERC, PRKCI, PIK3CA, SOX2, ETV5, BCL6</i>                                                                    | Low copy gain    | LPV |
| 14 | 7  | q22.1-36.2       | <i>CUX1, RINT1, MET, POT1, SMO, BRAF, PRSS1, EZH2, RHEB, XRCC2, PAXIP1</i>                                             | Single copy loss | LPV |
| 15 | 3  | q13.33-27.3      | <i>POLQ, GATA2, MBD4, TOPBP1, FOXL2, ATR, MECOM, TERC, PRKCI, PIK3CA, SOX2, ETV5, BCL6</i>                             | Low copy gain    | LPV |
| 15 | 14 | q32.32-32.33     | <i>TRAF3, XRCC3, AKT1, MTA1</i>                                                                                        | Single copy loss | VUS |
| 15 | 17 | q23.2-25.3       | <i>PPM1D, BRIP1, CD79B, AXIN2, PRKAR1A, SOX9, H3F3B, RHBDF2, SRSF2, RPTOR, C17ORF70</i>                                | Low copy gain    | VUS |
| 16 | 1  | p36.11-36.12     | <i>ID3</i>                                                                                                             | Single copy loss | VUS |
| 16 | 2  | p15-24.3         | <i>XPO1, REL, FANCL, MSH6, MSH2, EPCAM, SOS1, ALK, BRE, DNMT3A, GEN1, MYCN</i>                                         | Low copy gain    | VUS |
| 16 | 3  | q23-27.3         | <i>MECOM, TERC, PRKCI, PIK3CA, SOX2, ETV5, BCL6</i>                                                                    | Low copy gain    | LPV |
| 16 | 7  | p22.2-q21.2      | <i>CARD11, PMS2, RAC1, ETV1, JAZF1, IKZF1, EGFR, SBDS</i>                                                              | Low copy gain    | VUS |

|    |    |                  |                                                                                                                                                           |                  |     |
|----|----|------------------|-----------------------------------------------------------------------------------------------------------------------------------------------------------|------------------|-----|
| 16 | 8  | p11.23-p23.1     | <i>WHSC1L1, NRG1, WRN, PTK2B, NKX3-1, NEIL2, GATA4</i>                                                                                                    | Single copy loss | VUS |
| 16 | 9  | Whole chromosome | <i>JAK2, CD274, PDCD1LG2, MTAP, CDKN2A, CDKN2B, FANCG, RMRP, PAX5, GNAQ, NTRK2, FANCC, PTCH1, XPA, GALNT12, TAL2, KLF4, ENG, ABL1, TSC1, BRD3, NOTCH1</i> | Single copy loss | VUS |
| 16 | 10 | q23.2-26.13      | <i>BMPR1A, KLLN, PTEN, FAS, SUFU, NT5C2, FGFR2</i>                                                                                                        | Single copy loss | VUS |
| 16 | 17 | p11.2-13.3       | <i>RPA1, TP53, AURKB, MAP2K4, FLCN</i>                                                                                                                    | Single copy loss | LPV |
| 16 | 22 | Whole chromosome | <i>CRKL, MAPK1, SMARCB1, CHEK2, ZNFR3, EWSR1, NF2, EP300, DMC1, XRCC6</i>                                                                                 | Single copy loss | VUS |
| 18 | 7  | q31.33-36.1      | <i>POT1, SMO, BRAF, PRSS1, EZH2, RHEB, XRCC2, PAXIP1</i>                                                                                                  | Single copy loss | LPV |
| 18 | 11 | q22.3-23.2       | <i>ATM, SDHD, USP28</i>                                                                                                                                   | Single copy loss | VUS |
| 19 | 6  | q23.3-25.3       | <i>TNFAIP3, ARID1B</i>                                                                                                                                    | Single copy loss | VUS |
| 19 | 7  | q22.1-36.2       | <i>CUX1, RINT1, MET, POT1, SMO, BRAF, PRSS1, EZH2, RHEB, XRCC2, PAXIP1</i>                                                                                | Single copy loss | LPV |
| 19 | 11 | q22.1-23.2       | <i>YAP1, ATM, SDHD, USP28</i>                                                                                                                             | Single copy loss | VUS |
| 19 | 12 | q24.33           |                                                                                                                                                           | Low copy gain    | VUS |



**Table S3: Detected structural variants, SMZL**

| Case No. | Structural variant detected                                                                                                                                                                                                             | LPV/VUS |
|----------|-----------------------------------------------------------------------------------------------------------------------------------------------------------------------------------------------------------------------------------------|---------|
| 5        | 19 bp internal deletion (indel) in the <i>KLF2</i> gene on chromosome 19. The deletion spans the splice donor site of exon 2 and is predicted to interfere with mRNA splicing, most likely resulting in a prematurely truncated protein | LPV     |
| 7        | <i>TNFAIP3</i> gene on chromosome 6q. The deletion spans the terminal portion of exon 4 and the entirety of exon 5, as well as the intervening intron                                                                                   | LPV     |
| 12       | Multiple indels involving exon 5 of <i>CCND3</i>                                                                                                                                                                                        | LPV     |
| 18       | 20 bp deletion (indel) in exon 2 of <i>KLF2</i>                                                                                                                                                                                         | LPV     |
| 19       | 51 bp (i.e., in-frame) deletion in the <i>ABCB11</i> gene on chromosome 2q31                                                                                                                                                            | VUS     |

**Table S4: Genes covered in Oncopanel POPv3 NGS panel**

|                                                                                                                                                                                                                                                                                                                                                                                                                                                                                                                                                                                                                                                                                                                                                                                                                                                                                                                                                                                                                                                                                                                                                                                                                                                                                                                                                                                                                                                                                                                                                                                                                                                                                                                                                                                                                                                                                                                                                                                                                                                                                                                                                                                                                                                                                                                                                                                                                                                                                                                                                                                                                                                                                                                                                                                                                                                                                                                                                                                                                                                                                                                            |
|----------------------------------------------------------------------------------------------------------------------------------------------------------------------------------------------------------------------------------------------------------------------------------------------------------------------------------------------------------------------------------------------------------------------------------------------------------------------------------------------------------------------------------------------------------------------------------------------------------------------------------------------------------------------------------------------------------------------------------------------------------------------------------------------------------------------------------------------------------------------------------------------------------------------------------------------------------------------------------------------------------------------------------------------------------------------------------------------------------------------------------------------------------------------------------------------------------------------------------------------------------------------------------------------------------------------------------------------------------------------------------------------------------------------------------------------------------------------------------------------------------------------------------------------------------------------------------------------------------------------------------------------------------------------------------------------------------------------------------------------------------------------------------------------------------------------------------------------------------------------------------------------------------------------------------------------------------------------------------------------------------------------------------------------------------------------------------------------------------------------------------------------------------------------------------------------------------------------------------------------------------------------------------------------------------------------------------------------------------------------------------------------------------------------------------------------------------------------------------------------------------------------------------------------------------------------------------------------------------------------------------------------------------------------------------------------------------------------------------------------------------------------------------------------------------------------------------------------------------------------------------------------------------------------------------------------------------------------------------------------------------------------------------------------------------------------------------------------------------------------------|
| <b>A. Exonic sequences covered for SNVs and indels</b>                                                                                                                                                                                                                                                                                                                                                                                                                                                                                                                                                                                                                                                                                                                                                                                                                                                                                                                                                                                                                                                                                                                                                                                                                                                                                                                                                                                                                                                                                                                                                                                                                                                                                                                                                                                                                                                                                                                                                                                                                                                                                                                                                                                                                                                                                                                                                                                                                                                                                                                                                                                                                                                                                                                                                                                                                                                                                                                                                                                                                                                                     |
| ABCB11, ABL1, ACVR1, AKT1, AKT2, AKT3, ALK, APC, AR, ARAF, ARHGAP35, ARHGEF12, ARIDA, ARID1B, ARID2, ASXL1, ATM, ATR, ATRX, AURKA, AURKB, AXIN2, AXL, B2M, BABAM1, BAP1, BARD1, BCL11B, BCL2, BCL2L1, BCL2L12, BCL6, BCOR, BCORL1, BLM, BMPR1A, BRAF, BRCA1, BRCA2, BRCC3, BRD3, BRD4, BRE, BRIP1, BUB1B, C17ORF70, C19ORF40, C10ORF86, CALR, CARD11, CASP8, CBFA2T3, CFBF, CBL, CBLB, CCND1, CCND2, CCND3, CCNE1, CD274, CD79B, CDC73, CDH1, CDH4, CDK12, CDK4, CDK6, CDK8, CDKN1A, CDKN1B, CDKN1C, CDKN2A, CDKN2B, CDKN2C, CEBPA, CHEK1, CHEK2, CIC, CIITA, COL7A1, CREBBP, CRKL, CRLF2, CRTCL1, CSF3R, CTCF, CTLA4, CTNNA1, CTNNB1, CUX1, CXCR4, CYLD, DAXX, DCLRE1C, DDB1, DDB2, DDR2, DICER1, DIS3, DIS3L2, DKC1, DMC1, DNMT3A, DOCK8, EGFR, EGLN1, ELANE, EME1, ENG, EP300, EPCAM, ERBB2, ERBB3, ERBB4, ERCC1, ERCC2, ERCC3, ERCC4, ERCC5, ERCC6, ERG, ESR1, ETV1, ETV4, ETV5, ETV6, EWSR1, EXO1, EXT1, EXT2, EZH2, FAH, FAM175A, FAM46C, FAN1, FANCA, FANCB, FANCC, FANCD2, FANCE, FANCF, FANCG, FANCI, FANCL, FANCM, FAS, FAT1, FBXW7, FGFR1, FGFR2, FGFR3, FGFR4, FH, FLCN, FLT1, FLT3, FLT4, FOXA1, FOXL2, FUS, GALNT12, GATA2, GATA3, GATA4, GATA6, GBA, GEN1, GLI1, GLI2, GNA11, GNAQ, GNAS, GPC3, GREM1, H19, H3F3A, H3F3B, HABP2, HELQ, HFE, HIST1H3B, HIST1H3C, HMBS, HNF1A, HOXB13, HRAS, ID3, ID4, IDH1, IDH2, IGF1R, IGF2, IKZF1, IL7R, ITK, JAK1, JAK2, JAK3, JAZF1, KAT6A, KAT6B, KCNQ1, KDM5A, KDM5C, KDM6A, KDR, KEAP1, KIF1B, KIT, KLF2, KLF4, KLLN, KMT2A, KMT2D, KRAS, LIG4, LMO1, LMO2, MAF, MAFB, MAP2K1, MAP2K2, MAP2K4, MAP3K1, MAPK1, MAX, MBD4, MCL1, MCM8, MDM2, MDM4, MECOM, MED12, MEF2B, MEN1, MET, MGA, MITF, MLH1, MLH3, MPL, MRE11A, MSH2, MSH6, MTA1, MTAP, MTOR, MUS81, MUTYH, MYB, MYBL1, MYC, MYCL1, MYCN, MYD88, NBN, NEIL1, NEIL2, NEIL3, NF1, NF2, NFE2L2, NFKBIA, NFKBIE, NFKBIZ, NKX2-1, NKX3-1, NOTCH1, NOTCH2, NOTCH3, NPM1, NR0B1, NRAS, NRG1, NSD1, NT5C2, NTHL1, NTRK1, NTRK2, NTRK3, OGG1, PALB2, PARK2, PAX5, PAXIP1, PBRM1, PDCD1LG2, PDGFRA, PDGFRB, PHF6, PHOX2B, PIK3C2B, PIK3CA, PIK3R1, PIM1, PML, PMS1, PMS2, PNKP, POLB, POLD1, POLE, POLH, POLQ, POT1, PPARG, PPM1D, PPP2R1A, PRDM1, PRF1, PRKAR1A, PRKCI, PRKDC, PRSS1, PTCH1, PTEN, PTK2B, PTPN11, PTPN14, PVRL4, QKI, RAC1, RAD21, RAD50, RAD51, RAD51C, RAD51D, RAD52, RAD54B, RAF1, RARA, RASA1, RB1, RBBP8, RBM10, RECQL4, REL, RELA, RET, RHBDF2, RHEB, RHOA, RHOH, RHOT1, RICTOR, RIF1, RINT1, RIT1, RMRP, RNF43, RNF8, ROS1, RPA1, RPTOR, RSPO2, RSPO3, RUNX1, RUNX1T1, SBDS, SDHA, SDHAF2, SDHB, SDHC, SDHD, SERPINA1, SETBP1, SETD2, SF3B1, SH2B3, SH2D1A, SLC25A13, SLC34A2, SLX1A, SLX1B, SLX4, SMAD2, SMAD4, SMARCA4, SMARCB1, SMARCE1, SMC3, SMO, SOCS1, SOS1, SOX2, SOX9, SPOP, SRSF2, SRY, SS18, STAG2, STAT3, STAT6, STK11, SUFU, SUZ12, TAL1, TAL2, TAZ, TCEB1, TCF3, TCF7L2, TDG, TERC, TERT, TET1, TET2, TFE3, TLX3, TMEM127, TMPRSS2, TNFAIP3, TOPBP1, TP53, TP53BP1, TRAF3, TRAF7, TRIM37, TSC1, TSC2, TSHR, U2AF1, UBE2T, UIMC1, UROD, USP28, USP8, VEGFA, VHL, WAS, WHSC1, WHSC1L1, WRN, WT1, XPA, XPC, XPO1, XRCC1, XRCC2, XRCC3, XRCC4, XRCC5, XRCC6, YAP1, ZNF217, ZNRF3, ZRSR2 |
| <b>B. Intronic sequences covered for rearrangement dections</b>                                                                                                                                                                                                                                                                                                                                                                                                                                                                                                                                                                                                                                                                                                                                                                                                                                                                                                                                                                                                                                                                                                                                                                                                                                                                                                                                                                                                                                                                                                                                                                                                                                                                                                                                                                                                                                                                                                                                                                                                                                                                                                                                                                                                                                                                                                                                                                                                                                                                                                                                                                                                                                                                                                                                                                                                                                                                                                                                                                                                                                                            |
| ABL1, ALK, BCL6, BIRC3(API2), BRAF, CAN, CFBF, CIC, CIITA, CRTCL1, CRTCL3, EGFR, ERG, ESR1, ETV4, ETV5, ETV6, EWSR1, FGFR1, FGFR2, FGFR3, FIP1L1, FOXO1, FUS, JAK2, KMT2A, MET, MYB, MYBL1, NAB2, NCOA2, NPM1, NR4A3, NRG1, NTRK1, NTRK2, NTRK3, NUTM1, PDGFB, PDGFRA, PDGFRB, PHF1, PML, PPARG, RAF1, RARA, RELA, RET, ROS1, RSPO2, RSPO3, RUNX1, SLC34A2, SS18, SUZ12, TMPRSS2, TP53, WWTR1, YAP1, YWHAE                                                                                                                                                                                                                                                                                                                                                                                                                                                                                                                                                                                                                                                                                                                                                                                                                                                                                                                                                                                                                                                                                                                                                                                                                                                                                                                                                                                                                                                                                                                                                                                                                                                                                                                                                                                                                                                                                                                                                                                                                                                                                                                                                                                                                                                                                                                                                                                                                                                                                                                                                                                                                                                                                                                 |

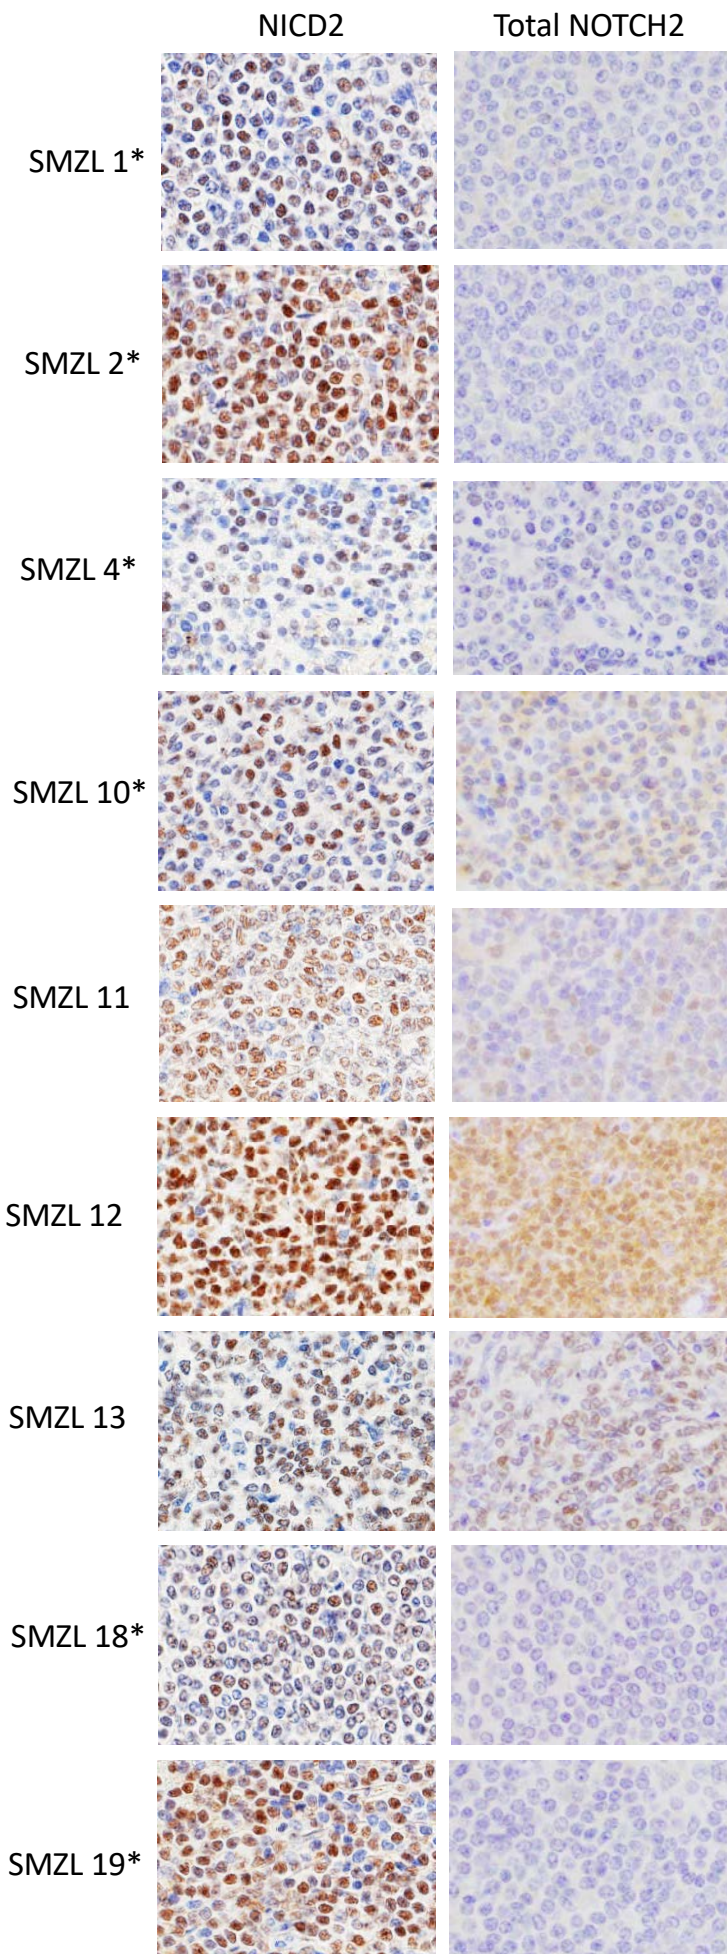

Supplementary Figure S1:  
 Representative images of *NOTCH2* mutated SMZL stained for NICD2 and total NOTCH2 (40X magnification). Tumors with *NOTCH2* PEST mutations that remove the C-terminal epitope recognized by the total NOTCH2 antibody are denoted by an asterisk.

Supplementary Figure S2: Representative images of patient derived xenograft (PDX) models of triple negative breast carcinoma stained for total NOTCH2 protein (40X magnification)

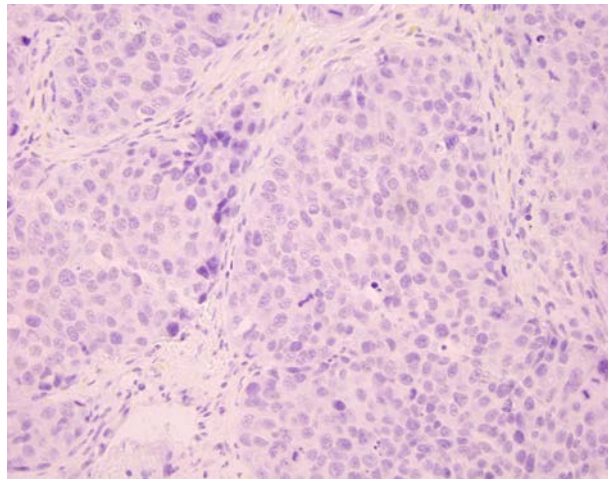

NOTCH2 negative PDX

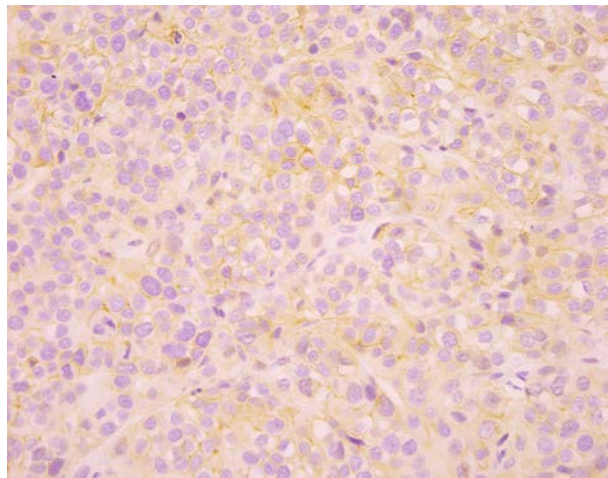

NOTCH2 positive PDX without  
*NOTCH2* rearrangement

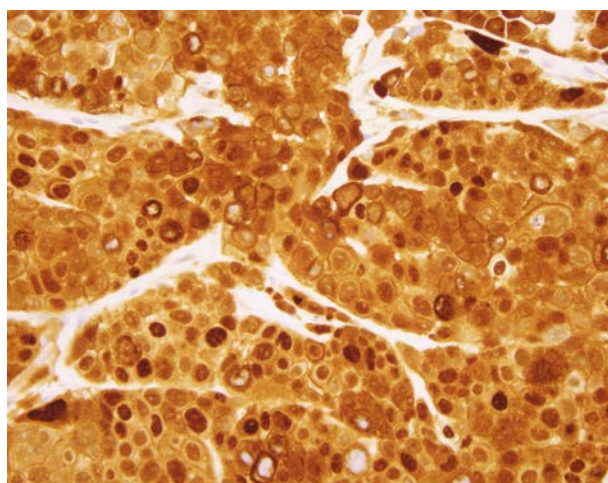

NOTCH2 positive PDX with  
*PHGDH-NOTCH2* rearrangement



Supplementary Figure S3: Histogram showing *NOTCH2* exon 34 mean RNA-seq coverage across DLBCL cases (n=311)

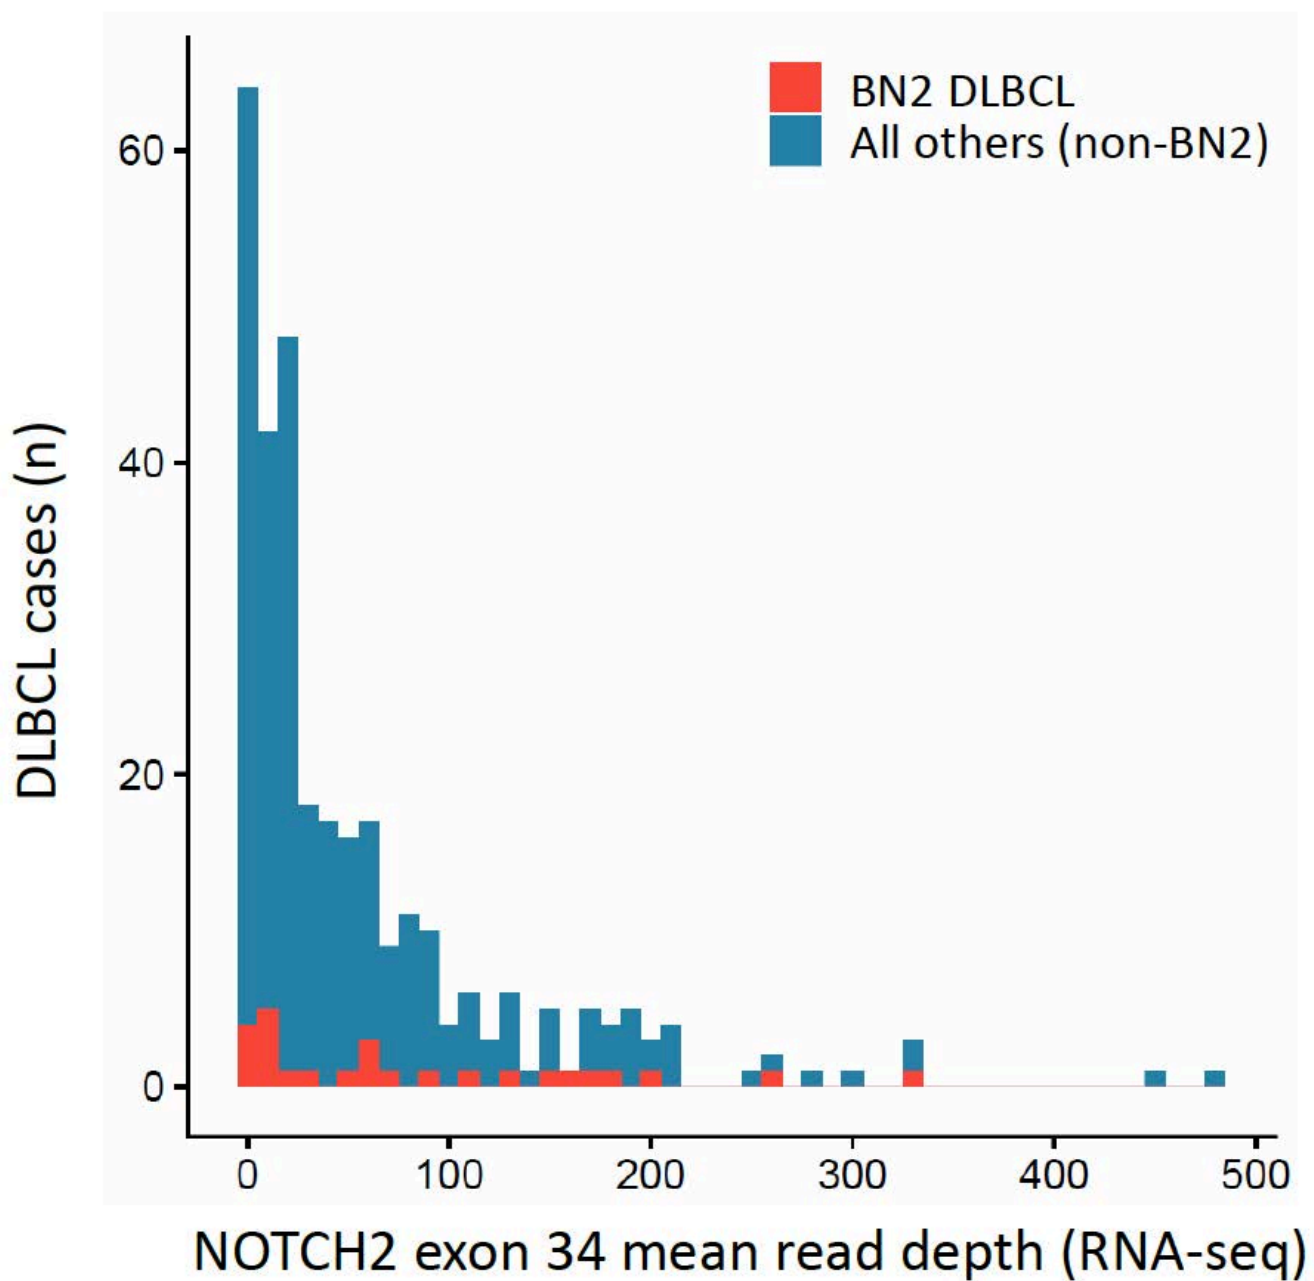

Supplementary Figure S4: Representative images of *NOTCH2* mutated DLBCL stained for BCL6, NICD2 and total NOTCH2 protein (40X magnification)

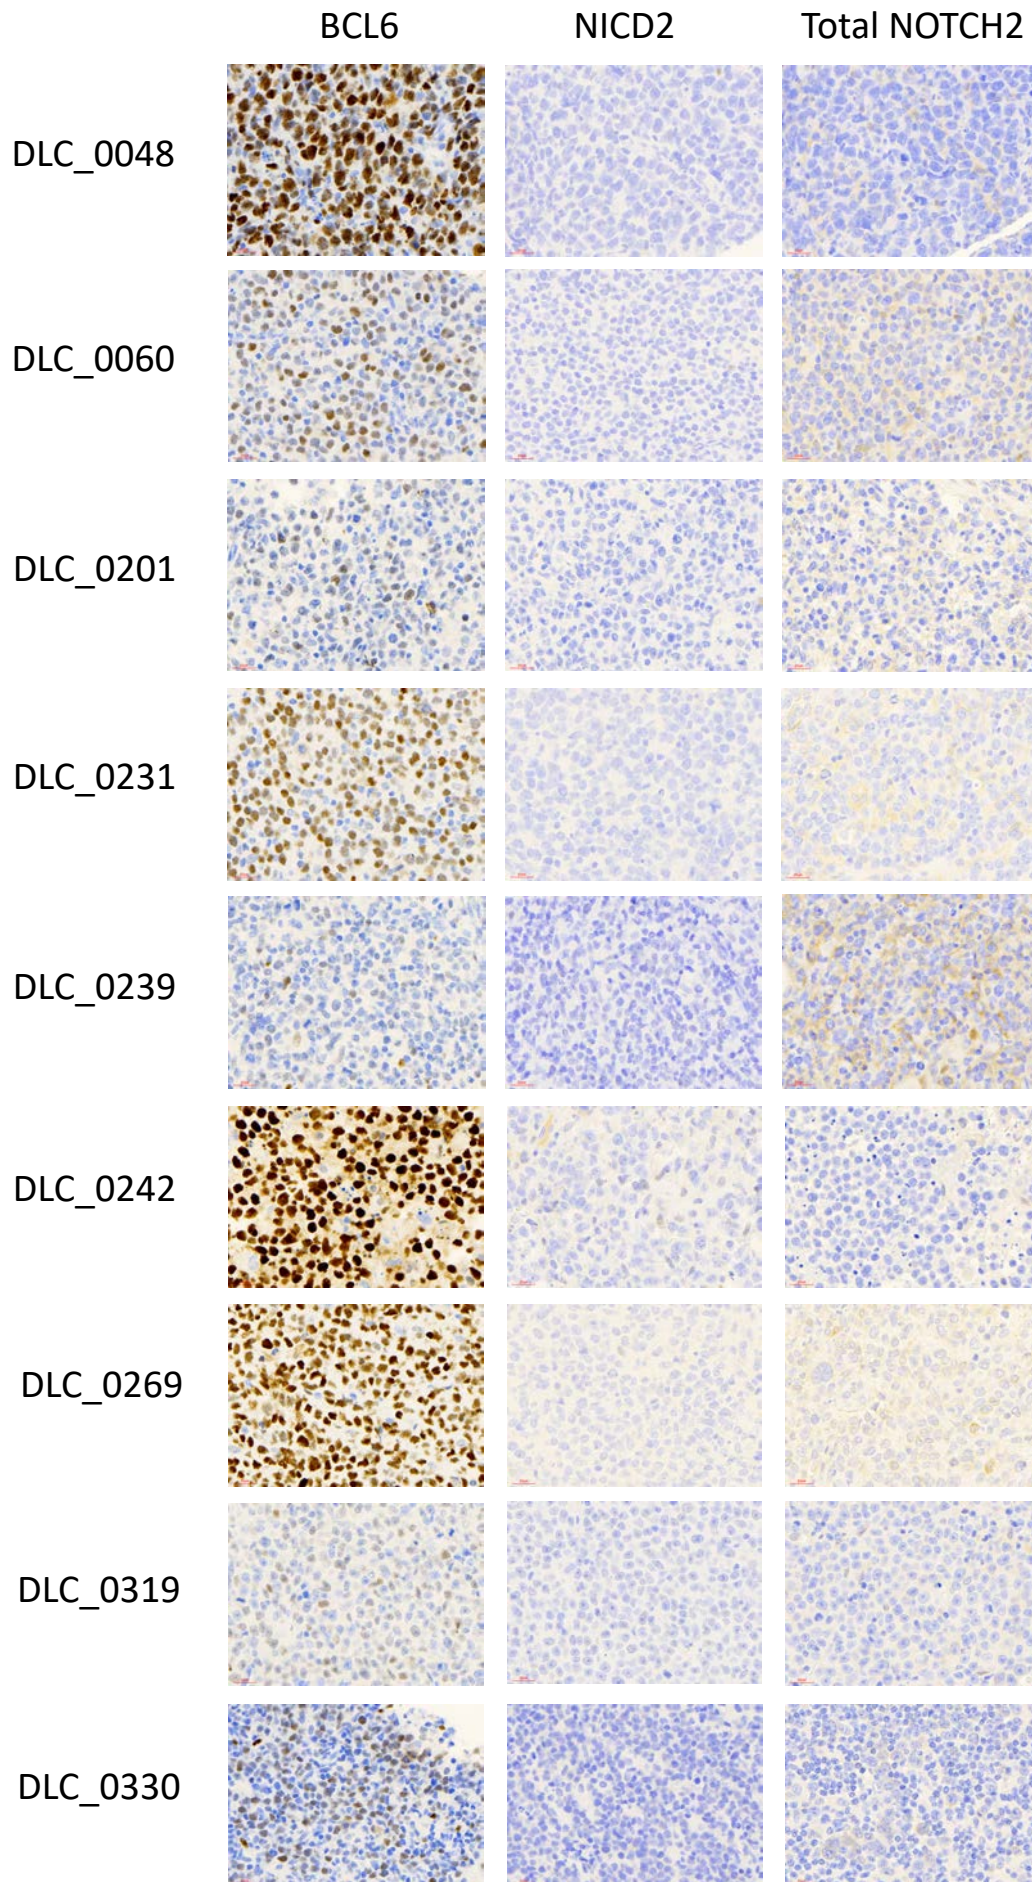

Supplement: advancesADV2020002995-suppl1.pdf [file advancesADV2020002995-suppl1.pdf]
